# Supplementary material for: Quality improvement bundles to decrease hypothermia in very low/extremely low birth weight infants at birth: a systematic review and meta-analysis
Source: PeerJ journal article supplement (doi:10.7717/peerj.18425), 2024-11-01

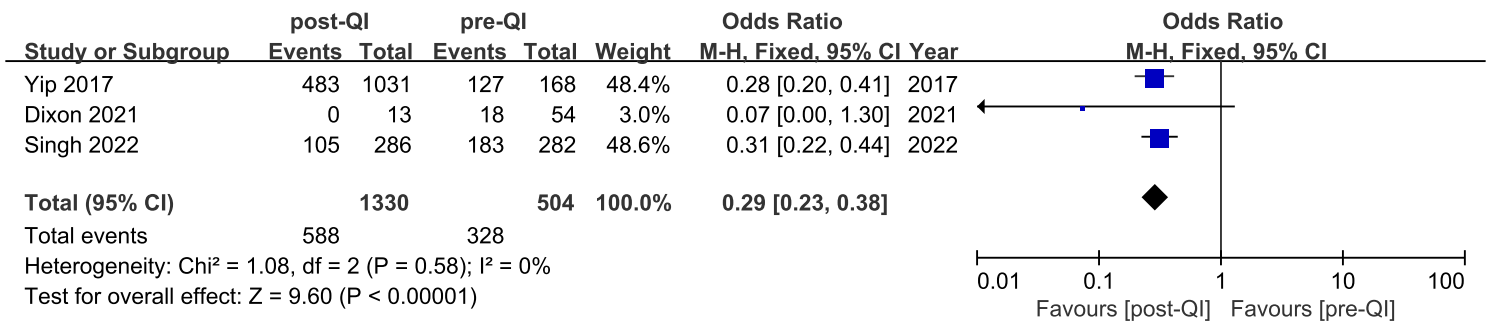

Supplement: .Forest_plot.pdf [file .Forest_plot.pdf]
