# Supplementary material for: Quality improvement bundles to decrease hypothermia in very low/extremely low birth weight infants at birth: a systematic review and meta-analysis
Source: PeerJ journal article supplement (doi:10.7717/peerj.18425), 2024-11-01

| Study or Subgroup                                                              | post-QI |            | pre-QI |            | Weight        | Odds Ratio         |                     | Year |
|--------------------------------------------------------------------------------|---------|------------|--------|------------|---------------|--------------------|---------------------|------|
|                                                                                | Events  | Total      | Events | Total      |               | M-H, Fixed, 95% CI | M-H, Fixed, 95% CI  |      |
| Billimoria 2013                                                                | 43      | 76         | 102    | 133        | 59.1%         | 0.40               | [0.22, 0.73]        | 2013 |
| Singh 2022                                                                     | 11      | 77         | 25     | 71         | 40.9%         | 0.31               | [0.14, 0.68]        | 2022 |
| <b>Total (95% CI)</b>                                                          |         | <b>153</b> |        | <b>204</b> | <b>100.0%</b> | <b>0.36</b>        | <b>[0.22, 0.58]</b> |      |
| Total events                                                                   | 54      |            | 127    |            |               |                    |                     |      |
| Heterogeneity: Chi <sup>2</sup> = 0.25, df = 1 (P = 0.62); I <sup>2</sup> = 0% |         |            |        |            |               |                    |                     |      |
| Test for overall effect: Z = 4.16 (P < 0.0001)                                 |         |            |        |            |               |                    |                     |      |

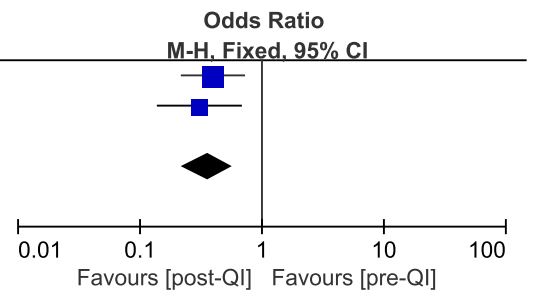

Supplement: Forest_plot_of_moderate_hypothermia.pdf [file Forest_plot_of_moderate_hypothermia.pdf]
